# Supplementary material for: Azido-perylenediimide: a versatile building block for CuAAC reactions and an alternative precursor for N-annulation
Source: Royal Society of Chemistry journal article supplement (doi:10.1039/d1nj02130c), 2021-01-01
Supplement: d1nj02130c1.pdf [file d1nj02130c1.pdf]

## **Azido-Perylenediimide : A Versatile Building Block for CuAAC Reactions and an Alternative Precursor for N-Annulation**

Antoine Goujon,\* Lou Rocard, Heorhii Melnychenko and Piétrick Hudhomme.\*

Univ Angers, CNRS, MOLTECH-Anjou, SFR MATRIX, F- 49000 Angers, France

[antoine.goujon@univ-angers.fr](mailto:antoine.goujon@univ-angers.fr)

[pietrick.hudhomme@univ-angers.fr](mailto:pietrick.hudhomme@univ-angers.fr)

## Table of Contents

|     |                                            |     |
|-----|--------------------------------------------|-----|
| 1.  | Materials and Methods .....                | S3  |
| 2.  | Synthesis.....                             | S4  |
| 3.  | Absorption and Emission Spectroscopy ..... | S8  |
| 4.  | Electrochemistry .....                     | S9  |
| 5.  | Optical and Electronic Properties .....    | S9  |
| 6.  | Thermogravimetric Analysis .....           | S10 |
| 7.  | Infrared Spectroscopy.....                 | S10 |
| 8.  | NMR.....                                   | S11 |
| 9.  | High Resolution Mass Spectrometry.....     | S14 |
| 10. | References .....                           | S16 |

## 1. Materials and Methods

**Materials and General Methods.** Thin Layer Chromatography (TLC) was conducted on pre-coated aluminum sheets with 0.20 mm Merck Alugram SIL G/UV254 with fluorescent indicator UV254. Column chromatography was carried out using Sigma-Aldrich silica gel 60 (particle size 63-200  $\mu\text{m}$ ). UV-Vis absorptions were recorded on a Shimadzu UV-1800 UV-Vis spectrophotometer using quartz cell (pathlength of 1 cm). Fluorescence was measured on a Shimadzu RF-6000 Spectrophotometer using quartz cell (pathlength of 1 cm). Quantum Yield were measured on a Jasco FP-8500 Spectrophotometer equipped with an ILF-835 integration sphere. Cyclic voltammetry experiments were carried out at room temperature with a Bio-Logic SAS SP-150 potentiostat. Nuclear magnetic resonance (NMR)  $^1\text{H}$  and  $^{13}\text{C}$  spectra were obtained on a Bruker 300 MHz Avance III spectrometer (300 MHz for  $^1\text{H}$  and 75 MHz for  $^{13}\text{C}$ ) or 500 MHz Avance III HD spectrometer (125 MHz for  $^{13}\text{C}$ ). Chemical shifts were reported in ppm according to tetramethylsilane using the solvent residual signal as an internal reference ( $\text{CDCl}_3$ :  $\delta \text{H} = 7.26$  ppm). Coupling constants ( $J$ ) were given in Hz. Resonance multiplicity was described as s (singlet), d (doublet), t (triplet), dd (doublet of doublets), m (multiplet) and br (broad signal). Carbon spectra were acquired with a complete decoupling for the proton. High resolution mass spectrometry (HRMS) was performed with a JEOL JMS-700 B/E. TGA analysis were performed on a TGA Q500 setup under nitrogen atmosphere using a platinum crucible. Chemicals were purchased from Sigma Aldrich, Acros Organics, Fisher Scientific, Alfa Aesar, Fluorochem, and were used as received. Solvents were purchased from Sigma Aldrich, Fluorochem, or Fischer Scientific while deuterated solvents from Sigma Aldrich.

**Abbreviations.** CV : cyclic voltammetry; DMF : dimethylformamide; HRMS : high resolution mass spectrometry; LUMO : lowest unoccupied molecular orbital; NMR : nuclear magnetic resonance; PDI : perylenediimide; PMDTA : N,N,N',N'',N''-pentamethyldiethylenetriamine; rt : room temperature; TGA : thermogravimetric analysis; THF : tetrahydrofuran, TLC : thin layer chromatography.

## 2. Synthesis

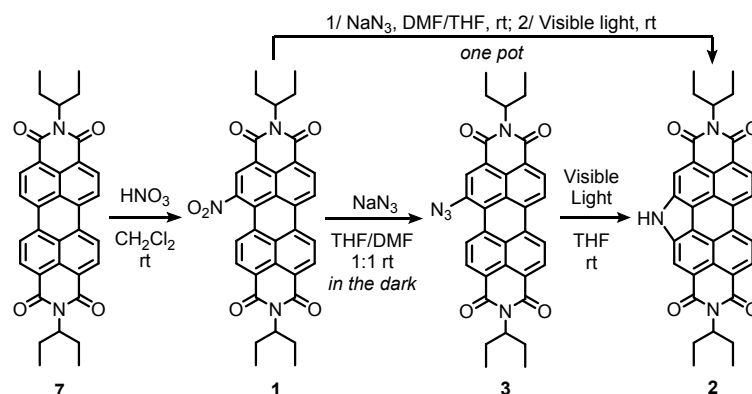

**Scheme S1.** Synthesis of  $\text{NO}_2$ -PDI **1**, intermediate  $\text{N}_3$ -PDI **3** and N-annulated derivative **2**.

Sodium azide is a hazardous reagent (explosive) and should be handled with care.

**Compound 1.** PDI **7**<sup>1</sup> (3 g, 5.65 mmol) was dissolved in  $\text{CH}_2\text{Cl}_2$  (400 mL) before fuming  $\text{HNO}_3$  was added (5.8 mL, 140 mmol). The mixture was stirred at rt until the starting material was completely converted into the mono-nitrated compound (according to TLC, around 30 min). Water was added (400 mL) and the organic phase was separated and washed with  $\text{NaHCO}_3$  sat. (400 mL). The organic phase was dried on  $\text{MgSO}_4$ , filtered and evaporated to afford a red solid. The crude was taken back in a minimum of  $\text{CH}_2\text{Cl}_2$  to which MeOH was added until precipitation. The suspension was cooled down to  $0^\circ\text{C}$  with an ice bath 15 min. Filtration afforded a red solid which was washed with MeOH and dried to afford **1** as a deep red solid (3.2 g, 98% yield). Characterizations were in accordance with previous reports.<sup>1</sup>

**Compound 2.** Two strategies:

One pot procedure. Compound **1** (1 g, 1.73 mmol) was dissolved in THF/DMF 1:1 (30 mL) and hidden from ambient light with aluminum foil.  $\text{NaN}_3$  (135 mg, 2.08 mmol) was added in one portion and the solution was stirred 30 min at rt, at which point TLC analysis showed complete disappearance of the starting material to the profit of intermediate **3**. The solution was then stirred while exposed to white light LEDs until complete conversion into compound **2**. Water was added (50 mL) and the solution was extracted with  $\text{CH}_2\text{Cl}_2$  (3 x 50 mL). The combined organic phase were dried on  $\text{MgSO}_4$  and evaporated. The red crude was dissolved in  $\text{CHCl}_3$  and pentane was added until precipitation. The solid was recovered by filtration and washed with cold pentane to afford **2** as a deep red solid (870 mg, 95% yield). Characterizations were in accordance with previous reports.<sup>1</sup>

Two steps procedure. Compound **1** (1 g, 1.73 mmol) was dissolved in THF/DMF 1:1 (30 mL) and hidden from ambient light with aluminum foil.  $\text{NaN}_3$  (135 mg, 2.08 mmol) was added in one portion and the solution was stirred 30 min at rt, at which point TLC analysis showed complete disappearance

of the starting material to the profit of the intermediate **3**. Water was added (50 mL) and the suspension was cooled down to 0°C with an ice bath 15 min. The suspension was filtered and the solid washed with water to afford intermediate **3** as a deep purple solid (940 mg, 95% yield), stable under ambient conditions. <sup>1</sup>H NMR (300 MHz, CDCl<sub>3</sub>): δ 9.75 (d, *J* = 8.4 Hz, 1H), 8.71 – 8.52 (m, 6H), 5.14 – 4.99 (m, 2H), 2.35 – 2.17 (m, 4H), 2.03 – 1.86 (m, 4H), 0.93 (t, *J* = 7.5 Hz, 12H). IR (cm<sup>-1</sup>, powder) : 2958 (w), 2932 (w), 2871 (w), 2106 (m), 1693 (s), 1652 (s), 1594 (s), 1533 (m), 1457 (m), 1404 (s), 1329 (s), 1246 (s), 1194 (s), 1084 (s).

Compound **3** (940 mg, 1.64 mmol) was dissolved in THF (30 mL) and exposed to white light LEDs until complete conversion into compound **2** (around 30 min). Water was added (50 mL) and the solution was extracted with CH<sub>2</sub>Cl<sub>2</sub> (3 x 50 mL). The combined organic phase were dried on MgSO<sub>4</sub> and evaporated. The red crude was dissolved in CHCl<sub>3</sub> and pentane was added until precipitation. The solid was recovered by filtration and washed with cold pentane and MeOH to afford **2** as a deep red solid (885 mg, quantitative yield). Characterizations were in accordance with previous reports.<sup>1</sup>

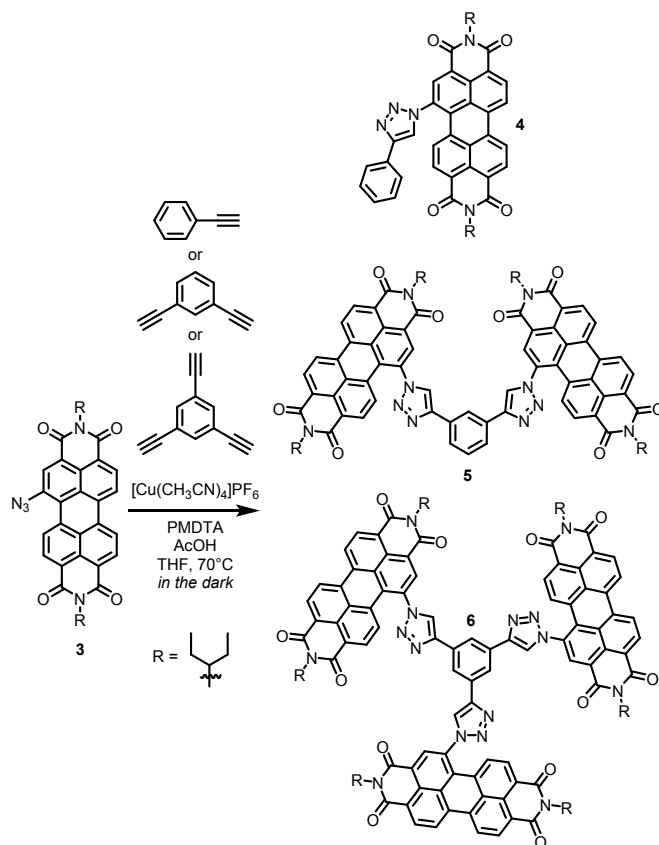

**Scheme S2.** Synthesis of clicked compounds **4**, **5** and **6**.

**Compound 4.** Intermediate **3** (100 mg, 0.17 mmol) was dissolved in THF (6 mL) in a Schlenk flask and hidden from ambient light by aluminum fold. To the solution were added phenylacetylene (18 μL, 0.26 mmol), [Cu(CH<sub>3</sub>CN)<sub>4</sub>]PF<sub>6</sub> (64 mg, 0.17 mmol), PMDTA (35 μL, 0.17 mmol) and glacial AcOH (38 μL, 68 mmol). The flask was flushed with argon and the mixture was stirred 6 hours at 75 °C. The

mixture was added to a separating funnel along with water (20 mL) and CH<sub>2</sub>Cl<sub>2</sub> (20 mL). The organic phase was washed with water (2 x 20 mL), dried on MgSO<sub>4</sub> and evaporated. The crude was purified on column chromatography (SiO<sub>2</sub>, CH<sub>2</sub>Cl<sub>2</sub>/Et<sub>2</sub>O 98:2) to afford click product **4** as a red solid (105 mg, 92% yield). <sup>1</sup>H NMR (500 MHz, CDCl<sub>3</sub>): δ 8.85-8.83 (m, 1H), 8.80-8.66 (m, 4H), 8.31-8.29 (d, *J* = 8.3 Hz, 1H), 8.14 (s, 1H), 8.04-7.94 (m, 2H), 7.61-7.50 (m, 2H), 7.53-7.42 (m, 1H), 6.87-6.84 (d, *J* = 8.3 Hz, 1H), 5.15-4.97 (m, 2H), 2.37-2.17 (m, 4H), 1.96-1.85 (m, 4H), 1.00-0.88 (m, 12H). <sup>13</sup>C NMR (125 MHz, CDCl<sub>3</sub>): δ 163.7, 150.4, 135.4, 133.8, 133.6, 132.5, 131.4, 131.3, 131.0, 129.6, 129.5, 129.2, 129.2, 129.2, 128.2, 127.6, 127.1, 126.1, 124.3, 123.7, 120.0, 58.2, 57.9, 25.0, 11.4. HRMS calcd. for C<sub>42</sub>H<sub>34</sub>N<sub>5</sub>O<sub>4</sub> ([M-H]<sup>+</sup>): 672.2605 found: 672.2615 (1.49 ppm error).

**Compound 5.** Intermediate **3** (100 mg, 0.17 mmol) was dissolved in THF (6 mL) in a Schlenk flask and hidden from ambient light by aluminum foil. To the solution were added 1,3-diethynylbenzene (23 μL, 0.09 mmol), [Cu(CH<sub>3</sub>CN)<sub>4</sub>]PF<sub>6</sub> (64 mg, 0.17 mmol), PDMTA (35 μL, 0.17 mmol) and glacial AcOH (38 μL, 68 mmol). The flask was flushed with argon and the mixture was stirred 6 hours at 75 °C. The mixture was added to a separating funnel along with water (20 mL) and CH<sub>2</sub>Cl<sub>2</sub> (20 mL). The organic phase was washed with water (2 x 20 mL), dried on MgSO<sub>4</sub> and evaporated. The crude was purified on column chromatography (SiO<sub>2</sub>, CH<sub>2</sub>Cl<sub>2</sub>/Et<sub>2</sub>O 98:5) to afford click product **5** as a red solid (94 mg, 88% yield). <sup>1</sup>H NMR (500 MHz, CDCl<sub>3</sub>): δ 8.73-8.67 (d, *J* = 8.0 Hz, 2H), 8.66 – 8.53 (m, 8H), 8.45 (s, 1H), 8.24 (s, 2H), 8.23 (d, *J* = 7.9 Hz, 2H), 7.96-7.92 (d, *J* = 7.9 Hz, 2H), 7.6-7.55 (t, *J* = 7.8 Hz, 1H), 6.75-6.71 (d, *J* = 8.3 Hz, 2H), 5.03-4.84 (m, 4H), 2.30-1.99 (m, 8H), 1.92-1.72 (m, 8H), 0.92 (t, *J* = 7.4 Hz, 12H), 0.84 (t, *J* = 7.4 Hz, 12H). <sup>13</sup>C NMR (125 MHz, CDCl<sub>3</sub>): δ 163.7, 149.8, 135.3, 133.6, 133.4, 132.5, 131.4, 131.3, 130.9, 130.4, 130.1, 129.6, 129.1, 129.1, 128.3, 128.1, 127.5, 127.0, 126.5, 124.3, 124.1, 123.7, 123.6, 123.4, 120.6, 58.1, 57.8, 25.0, 11.4, 11.4. HRMS calcd. for C<sub>78</sub>H<sub>66</sub>N<sub>6</sub>O<sub>8</sub> ([M-4N]<sup>+</sup>): 1212.4780 found: 1212.4764 (1.31 ppm error).

**Compound 6.** Intermediate **3** (100 mg, 0.17 mmol) was dissolved in THF (6 mL) in a Schlenk flask and hidden from ambient light by aluminum foil. To the solution were added 1,3,5-triethynylbenzene (8.5 mg, 0.06 mmol), [Cu(CH<sub>3</sub>CN)<sub>4</sub>]PF<sub>6</sub> (64 mg, 0.17 mmol), PDMTA (35 μL, 0.17 mmol) and glacial AcOH (38 μL, 68 mmol). The flask was flushed with argon and the mixture was stirred 6 hours at 75 °C. The mixture was added to a separating funnel along with water (20 mL) and CH<sub>2</sub>Cl<sub>2</sub> (20 mL). The organic phase was washed with water (2 x 20 mL), dried on MgSO<sub>4</sub> and evaporated. The crude was purified on column chromatography (SiO<sub>2</sub>, CH<sub>2</sub>Cl<sub>2</sub>/Et<sub>2</sub>O 98:5) to afford click product **6** as a red solid (92 mg, 87% yield). <sup>1</sup>H NMR (500 MHz, CDCl<sub>3</sub>): δ 8.75-8.7 (d, *J* = 8.0 Hz, 3H), 8.69 – 8.55 (m, 15H), 8.39 (s, 3H), 8.22-8.17 (d, *J* = 8.2 Hz, 3H), 6.81-6.76 (d, *J* = 8.3 Hz, 3H), 5.08-4.82 (m, 6H), 2.29-2.02 (m, 12H), 1.92-1.72 (m, 12H), 0.93 (t, *J* = 7.4 Hz, 18H), 0.86 (t, *J* = 7.4 Hz, 18H). <sup>13</sup>C NMR (125 MHz, CDCl<sub>3</sub>): δ 163.7, 149.3, 135.4, 133.6, 133.5, 132.5, 131.4, 131.3, 131.2, 131.0, 129.7, 129.2, 128.2, 127.6, 127.1, 124.4, 124.2, 123.8, 123.7, 123.5, 121.2, 58.2, 57.9, 25.0, 11.4. HRMS calcd. for C<sub>114</sub>H<sub>93</sub>N<sub>9</sub>O<sub>12</sub> ([M-6N]<sup>+</sup>): 1779,6949 found: 1779,6953 (0.19 ppm error).

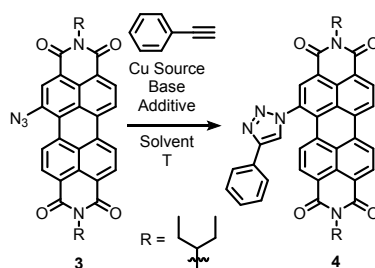

| Entry | Cu source                                             | Base             | Ligand | Additive    | Solvent              | T      | Outcome                        |
|-------|-------------------------------------------------------|------------------|--------|-------------|----------------------|--------|--------------------------------|
| 1     | CuSO <sub>4</sub> ·5H <sub>2</sub> O                  | /                | /      | NaAscorbate | THF/H <sub>2</sub> O | rt     | No conversion                  |
| 2     | CuI                                                   | NEt <sub>3</sub> | /      | /           | THF                  | rt     | Low conversion + side products |
| 3     | CuI                                                   | NEt <sub>3</sub> | /      | /           | THF                  | Reflux | Low conversion + side products |
| 4     | CuBr                                                  | /                | PMDTA  | /           | DMF                  | rt     | Low conversion + side products |
| 5     | CuBr                                                  | /                | PMDTA  | /           | DMF                  | 80°C   | Low conversion + side products |
| 6     | [Cu(CH <sub>3</sub> CN) <sub>4</sub> ]PF <sub>6</sub> | 1,6-lutidine     | /      | /           | THF                  | Reflux | Conversion<br>Low rate         |
| 7     | [Cu(CH <sub>3</sub> CN) <sub>4</sub> ]PF <sub>6</sub> | /                | PMDTA  | AcOH        | THF                  | Reflux | Full conversion in 6h          |

**Table S1.** Conditions screening for the CuAAC reactions involving azide **3**.

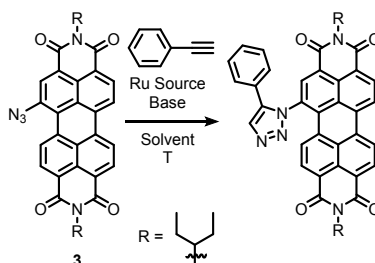

| Entry | Ru source                                                                                    | Base             | Solvent        | T      | Outcome       |
|-------|----------------------------------------------------------------------------------------------|------------------|----------------|--------|---------------|
| 1     | Cp*RuCl(PPh <sub>3</sub> ) <sub>2</sub> , RuCl <sub>2</sub> (PPh <sub>3</sub> ) <sub>2</sub> | /                | Toluene or THF | rt     | Decomposition |
| 2     | Cp*RuCl(PPh <sub>3</sub> ) <sub>2</sub> , RuCl <sub>2</sub> (PPh <sub>3</sub> ) <sub>2</sub> | /                | Toluene or THF | reflux | Decomposition |
| 3     | Cp*RuCl(PPh <sub>3</sub> ) <sub>2</sub> , RuCl <sub>2</sub> (PPh <sub>3</sub> ) <sub>2</sub> | NEt <sub>3</sub> | Toluene or THF | reflux | Decomposition |
| 4     | [RuCp*(MeCN) <sub>3</sub> ]PF <sub>6</sub>                                                   | /                | Toluene or THF | rt     | Decomposition |
| 5     | [RuCp*(MeCN) <sub>3</sub> ]PF <sub>6</sub>                                                   | /                | Toluene or THF | reflux | Decomposition |
| 6     | [RuCp*(MeCN) <sub>3</sub> ]PF <sub>6</sub>                                                   | NEt <sub>3</sub> | Toluene or THF | reflux | Decomposition |
| 7     | Cp*RuCl(cod)                                                                                 | /                | Toluene or THF | rt     | Decomposition |
| 8     | Cp*RuCl(cod)                                                                                 | /                | Toluene or THF | Reflux | Decomposition |
| 9     | Cp*RuCl(cod)                                                                                 | NEt <sub>3</sub> | Toluene or THF | Reflux | Decomposition |

**Table S2.** Conditions screening for the RuAAC reactions involving azide **3**.

### 3. Absorption and Emission Spectroscopy

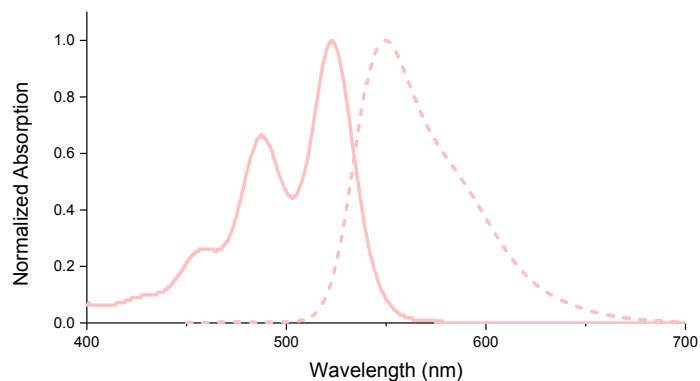

**Figure S1.** Normalized absorption (full line) and emission (dashed line) spectra of **4** in  $\text{CH}_2\text{Cl}_2$ ,  $5 \cdot 10^{-5}$  M.

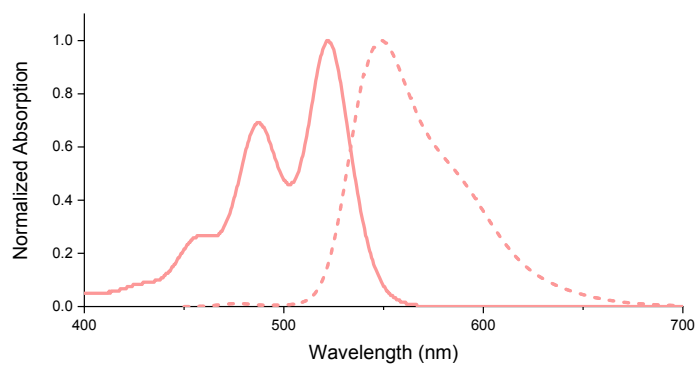

**Figure S2.** Normalized absorption (full line) and emission (dashed line) spectra of **5** in  $\text{CH}_2\text{Cl}_2$ ,  $5 \cdot 10^{-5}$  M.

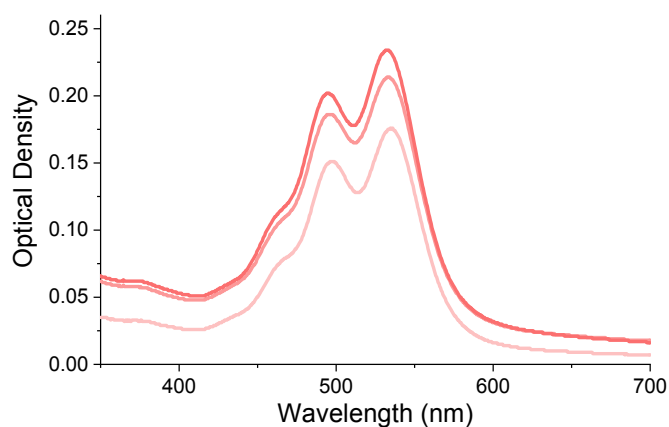

**Figure S3.** Absorption spectra in thin films of **4**, **5** and **6** (from bottom to top). Spin-coated at 2000 rpm from  $3 \text{ mg} \cdot \text{mL}^{-1}$  solution in  $\text{CH}_2\text{Cl}_2$ .

## 4. Electrochemistry

Cyclic voltammetry was performed with Pt as a working electrode, an Ag/AgNO<sub>3</sub> reference electrode (calibrated to the Fc/Fc<sup>+</sup> couple) and a Pt wire as counter electrode, with Bu<sub>4</sub>NPF<sub>6</sub> 0.1M in CH<sub>2</sub>Cl<sub>2</sub>, 100 mV/s, solutions degassed 2 min with argon prior to measurements.

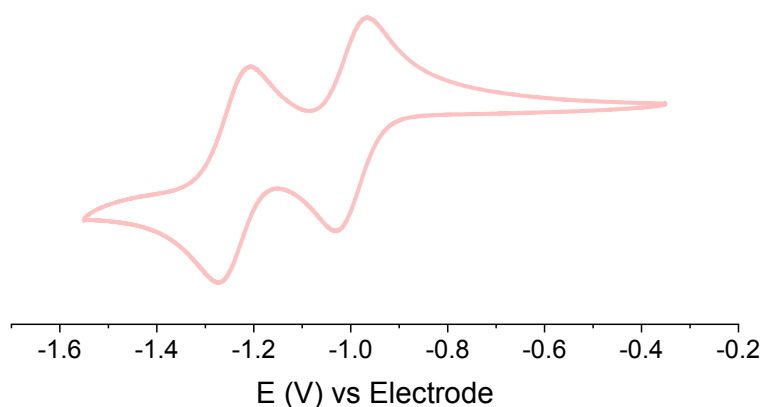

**Figure S4.** Cyclic voltammogram of compound **4**.

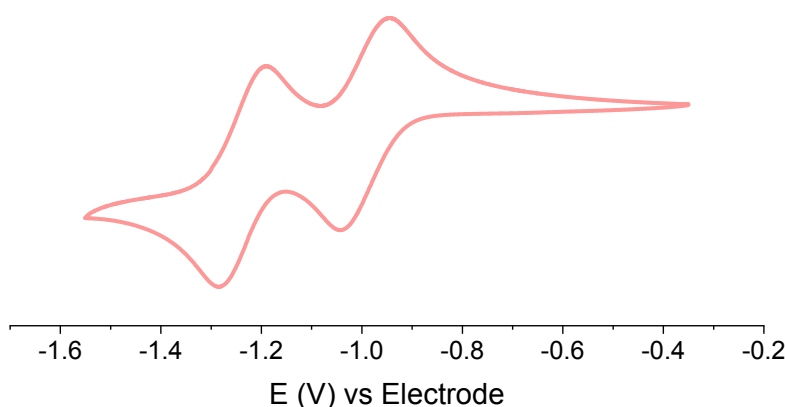

**Figure S5.** Cyclic voltammogram of compound **5**.

## 5. Optical and Electronic Properties

| Compound | $\lambda_{abs}/nm^a$<br>sol. | $\lambda_{abs}/nm^a$<br>film | $\epsilon/10^3 M^{-1}cm^{-1b}$ | $\lambda_{em}/nm$ | $\Phi_f^c$ | $E_{1/2}^{red1}/V^d$ | $E^{LUMO}/eV^e$ |
|----------|------------------------------|------------------------------|--------------------------------|-------------------|------------|----------------------|-----------------|
| <b>4</b> | 522                          | 535                          | 81.8                           | 550               | 0.75       | -0.98                | -3.82           |
| <b>5</b> | 523                          | 533                          | 120.8                          | 549               | 0.74       | -0.98                | -3.82           |
| <b>6</b> | 522                          | 532                          | 135.2                          | 550               | 0.53       | -0.98                | -3.82           |

**Table S3.** Optical and Electronic properties of clicked compounds **4**, **5** and **6**.

Absorption and emission spectra, reduction potentials data recorded in CH<sub>2</sub>Cl<sub>2</sub> at rt. <sup>a</sup>Maximum wavelength of the lowest energy absorption band. <sup>b</sup>Extinction coefficient of the lowest energy absorption band. <sup>c</sup>Fluorescence Quantum Yields measured with an integration sphere.

<sup>d</sup>Recorded using 0.1 M *n*-Bu<sub>4</sub>PF<sub>6</sub>. <sup>e</sup>Calculated from the formula  $E^{LUMO} = -[E_{1/2}^{red1} + 4.8] eV$ .

## 6. Thermogravimetric Analysis

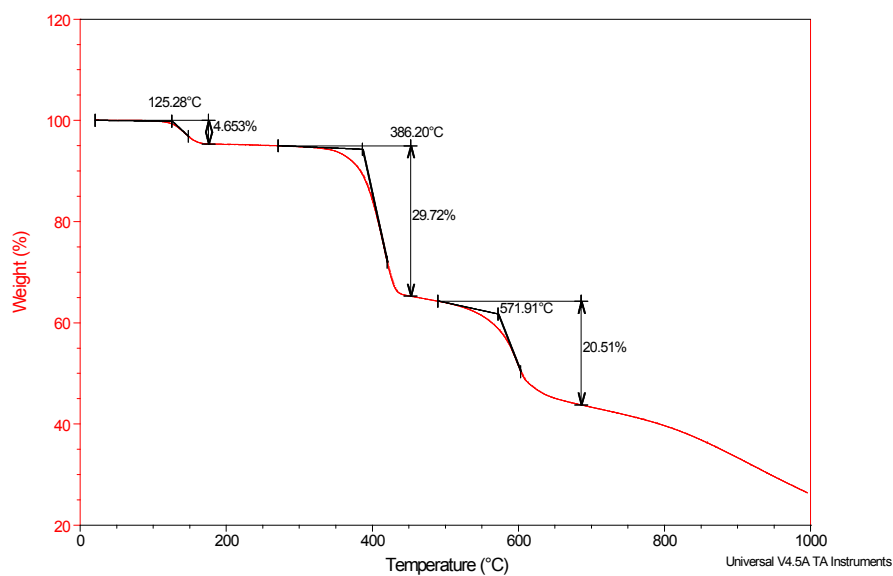

Figure S6. Thermogravimetric analysis of compound 2.

## 7. Infrared Spectroscopy

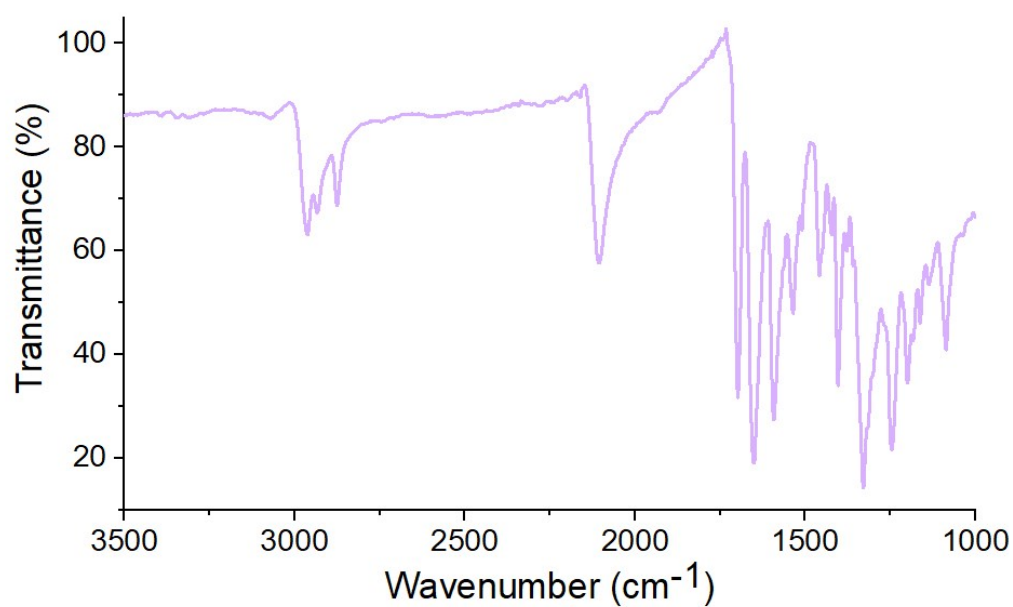

Figure S7. Infrared spectrum of compound 3.

## 8. NMR

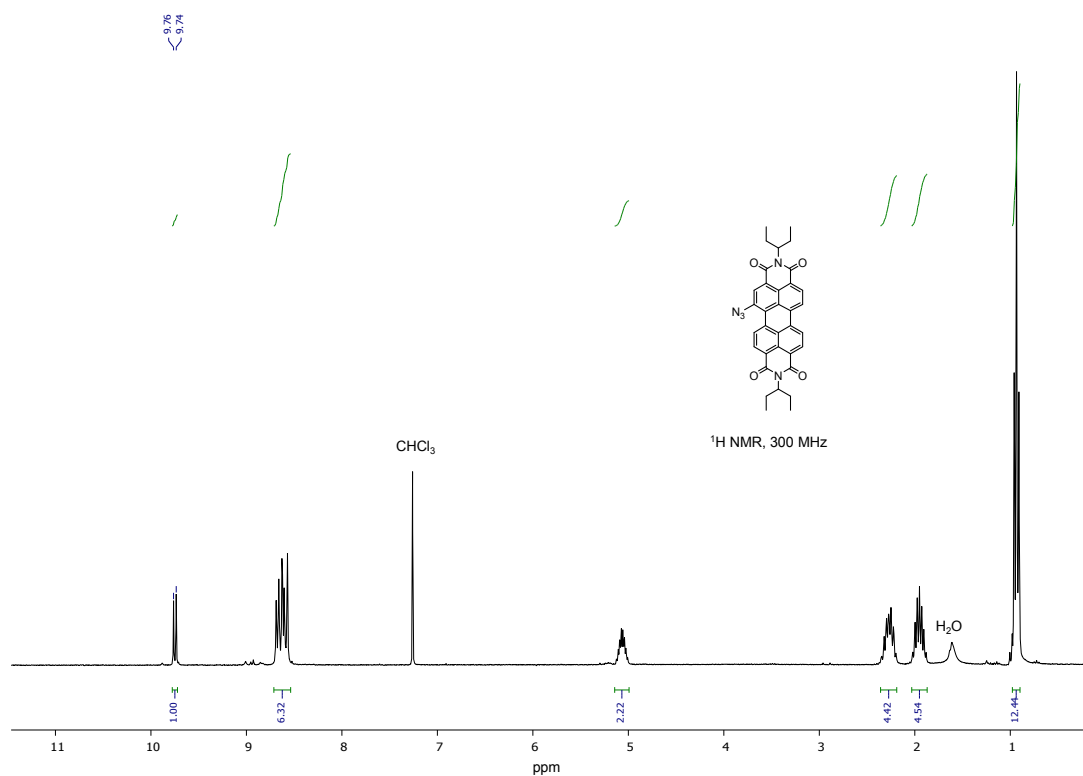

**Figure S8.** <sup>1</sup>H NMR (300 MHz) spectrum of compound **3** in CDCl<sub>3</sub>.

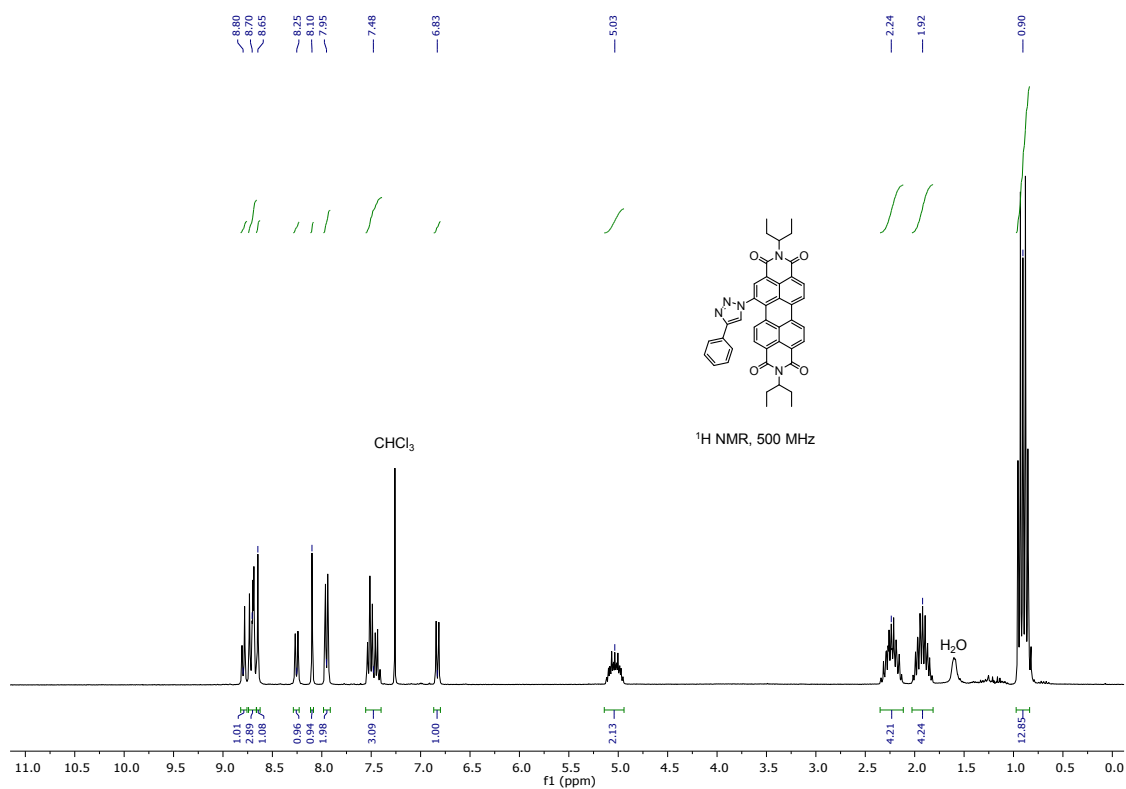

**Figure S9.** <sup>1</sup>H NMR (500 MHz) spectrum of compound **4** in CDCl<sub>3</sub>.

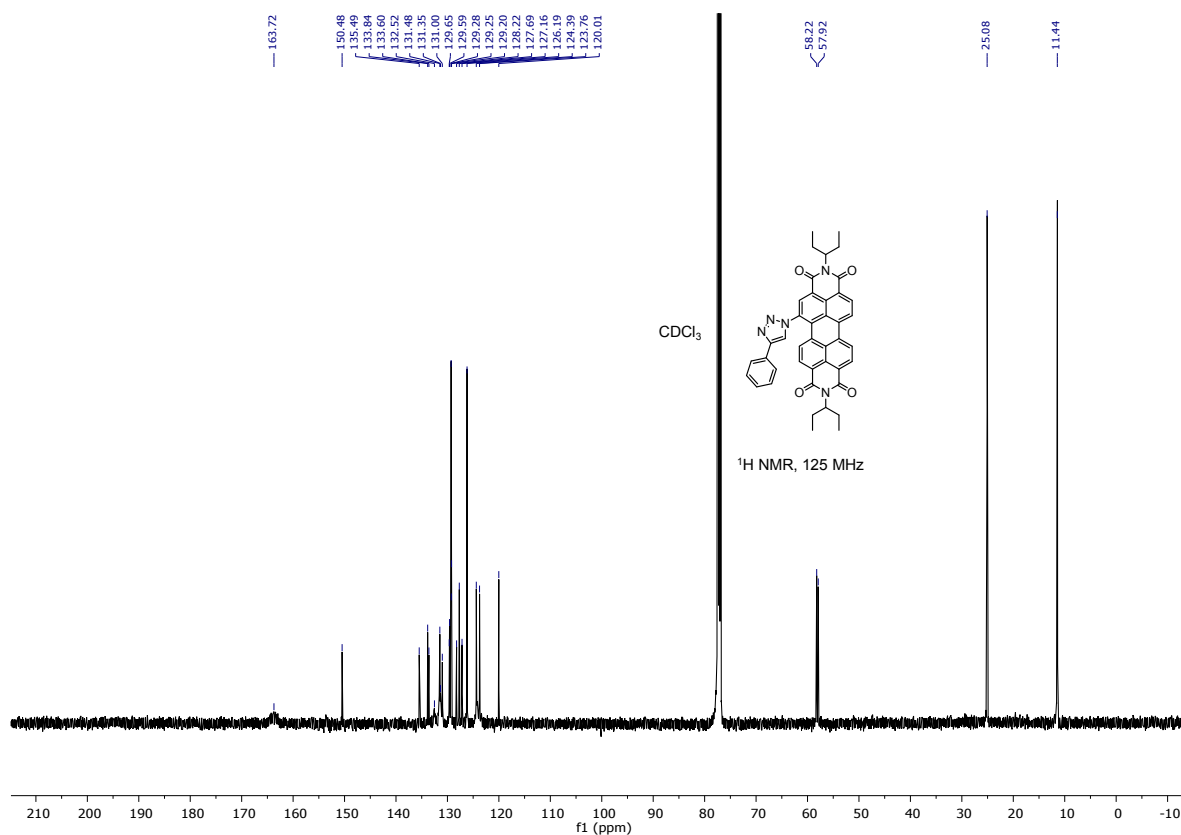

**Figure S10.** <sup>13</sup>C NMR (125 MHz) spectrum of compound **4** in CDCl<sub>3</sub>.

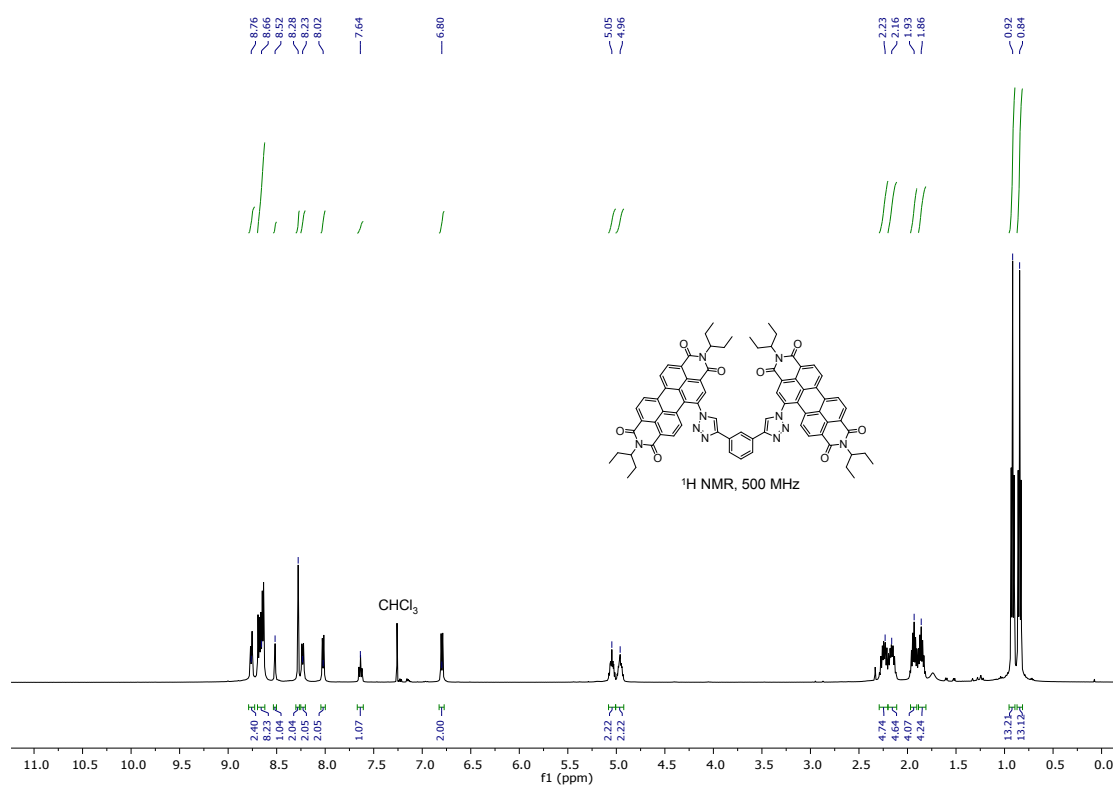

**Figure S11.** <sup>1</sup>H NMR (500 MHz) spectrum of compound **5** in CDCl<sub>3</sub>.

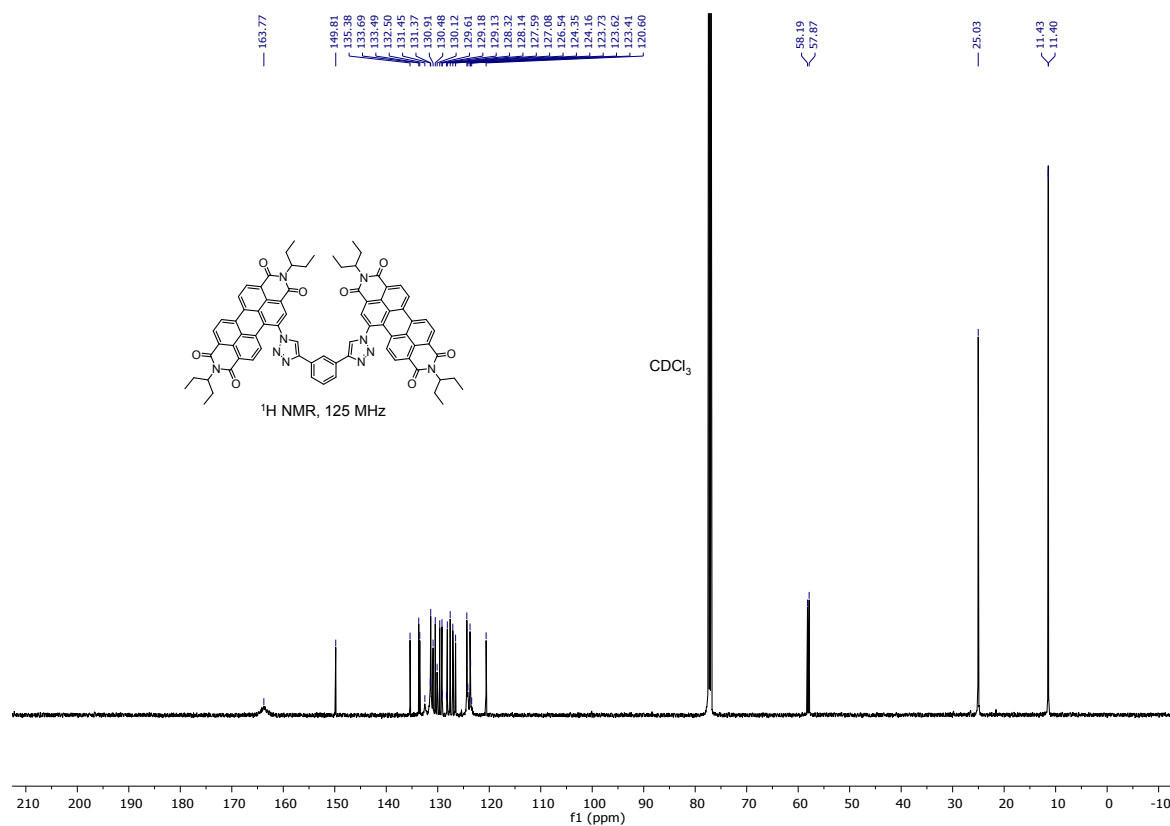

**Figure S12.**  $^{13}\text{C}$  NMR (125 MHz) spectrum of compound **5** in  $\text{CDCl}_3$ .

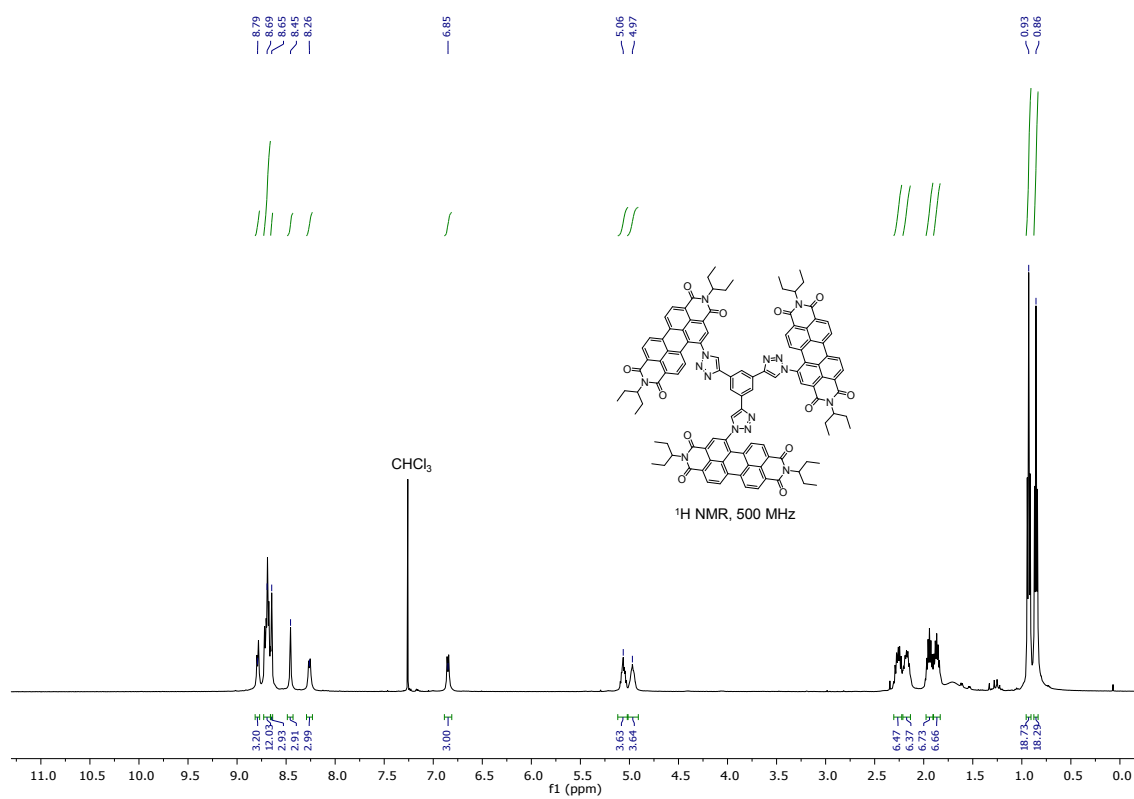

**Figure S13.**  $^1\text{H}$  NMR (500 MHz) spectrum of compound **6** in  $\text{CDCl}_3$ .

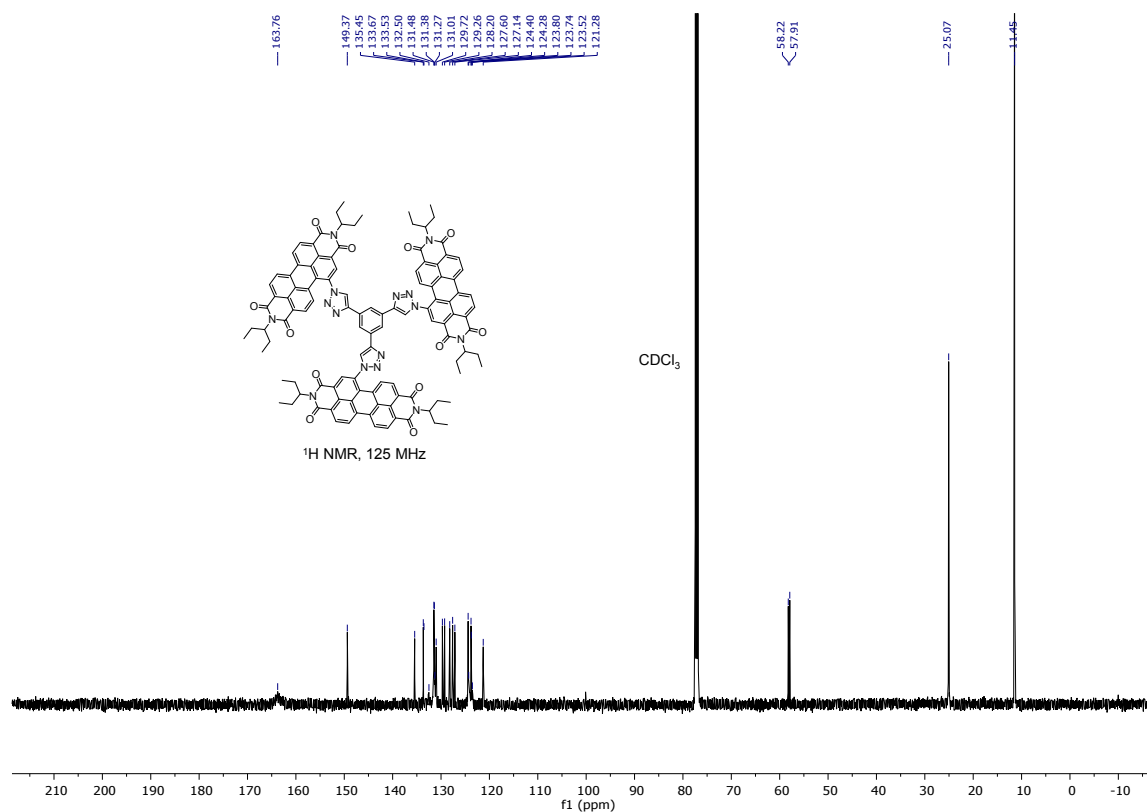

Figure S14.  $^{13}\text{C}$  NMR (125 MHz) spectrum of compound **6** in  $\text{CDCl}_3$ .

## 9. High Resolution Mass Spectrometry

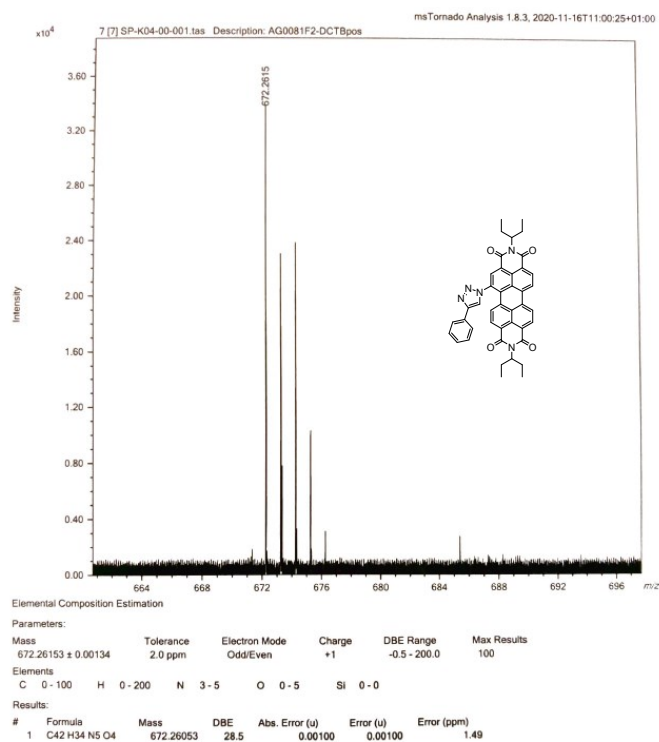

**Figure S15.** HRMS spectrum of compound **4**.

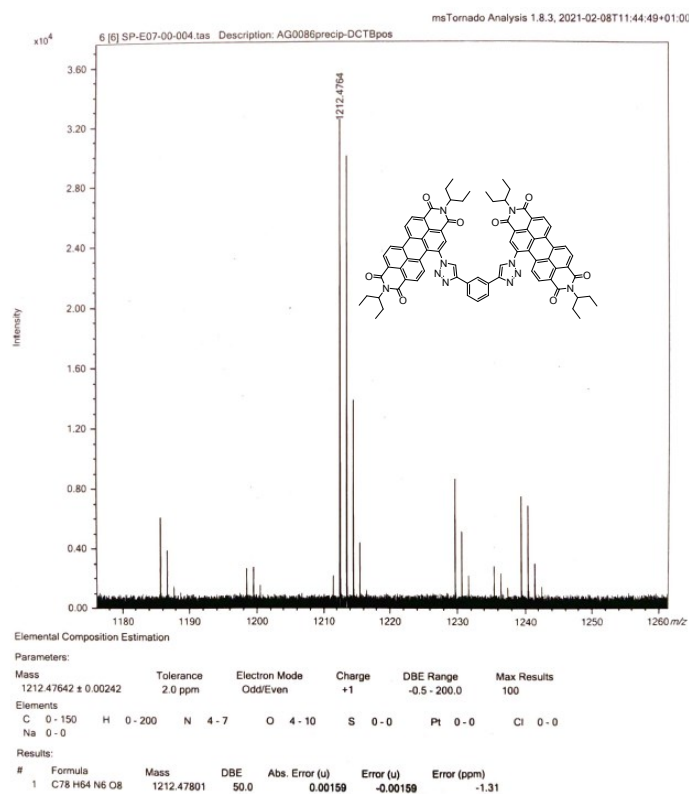

**Figure S16.** HRMS spectrum of compound **5**.

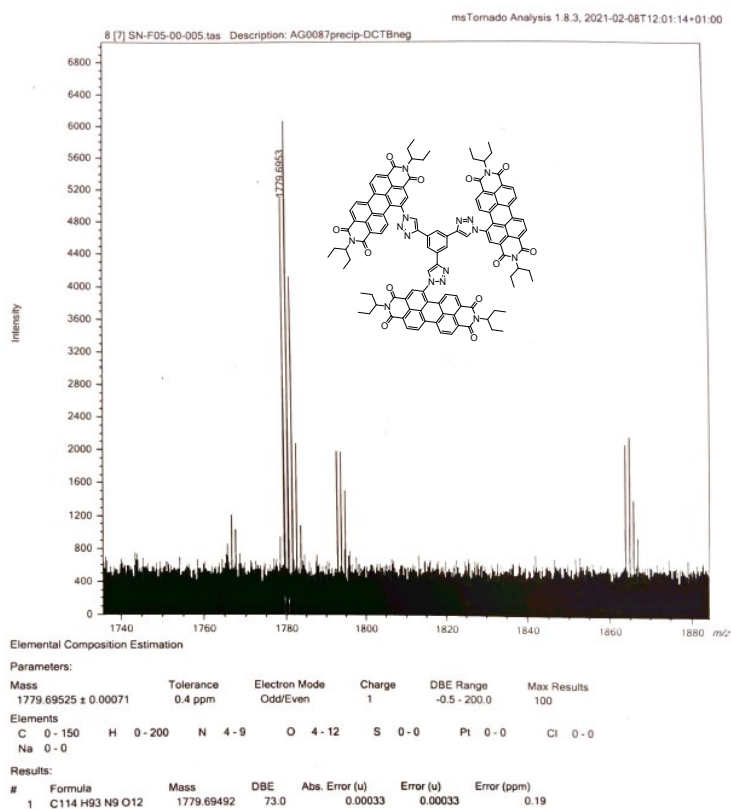

**Figure S17.** HRMS spectrum of compound **6**.

## **10. References**

1. A. D. Hendsbee, J.-P. Sun, W. K. Law, H. Yan, I. G. Hill, D. M. Spasyuk and G. C. Welch, *Chem. Mater.*, 2016, **28**, 7098.
